# Supplementary material for: Spontaneous resolution of a homochiral helix built from a tetra-nuclear nickel cluster
Source: Royal Society of Chemistry journal article supplement (doi:10.1039/c2ce25108f), 2012-01-01
Supplement: c2ce25108f.pdf [file c2ce25108f.pdf]

## Spontaneous resolution of a homochiral helix built from tetra-nuclear nickel cluster

Wenxu Zheng,<sup>ab</sup> Yongqin Wei,<sup>a</sup> Chong-Bin Tian,<sup>ab</sup> Xueying Xiao,<sup>ab</sup> and Kechen Wu<sup>a\*</sup>

<sup>a</sup> State Key Laboratory of Structure Chemistry, Fujian Institute of Research on the Structure of Matter, Chinese Academy of Sciences, Fuzhou, Fujian 350002, P. R. China

<sup>b</sup> Graduate School of Chinese Academy of Sciences, Beijing 100039, P. R. China.

\* The corresponding author, Tel: (+86)- 591-83792600; E-mail: [wkc@fjirsm.ac.cn](mailto:wkc@fjirsm.ac.cn)

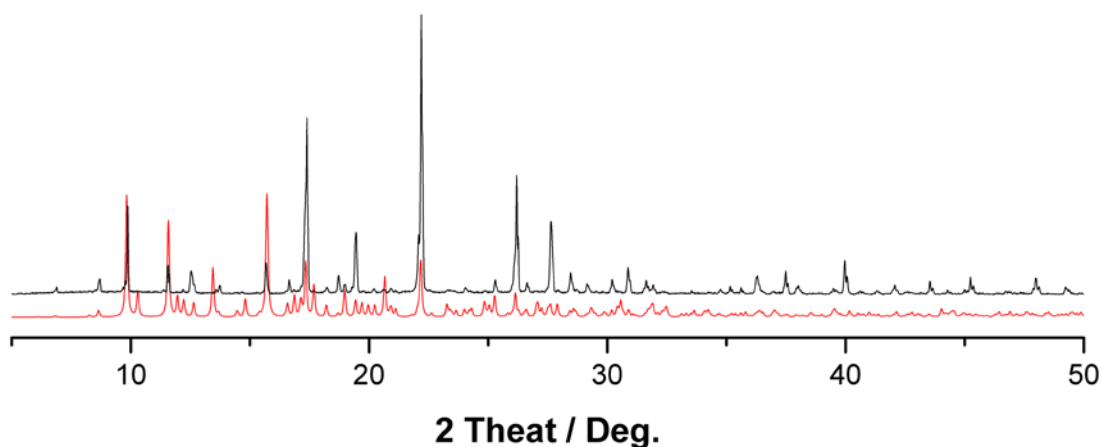

**Fig. S1.** XPRD patterns for **1** (top, black) experimental at room temperature; (bottom, red) calculated on the basis of the structure determined by single-crystal X-ray diffraction.

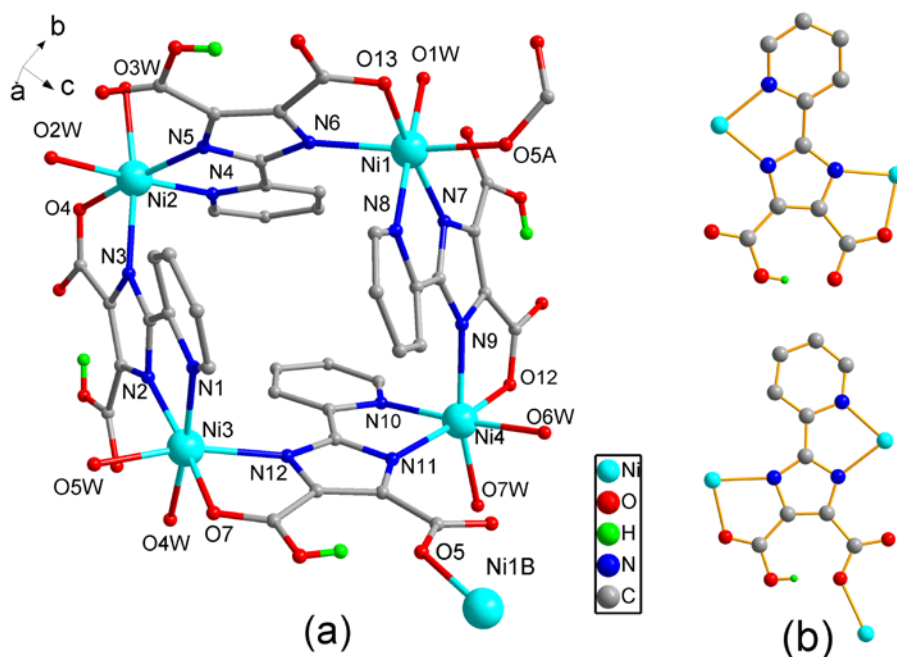

**Fig. S2.** Coordination environment of Ni(II) (a) and bonding mode of **L** (b) in compound **1P**. The

bond length of Ni1—O5A is 2.152(2) Å. Symmetry code: A  $-x, 0.5+y, -0.5-z$ ; B  $1-x, -0.5+y, 0.5-z$ . Guest water molecular and hydrogen atoms in pyridyl rings and coordination water molecules are omitted for clarity.

**Table S1** Geometrical parameters of hydrogen bonds in **1P**.

| D-H...A                | D-H/ Å | H...A/ Å | D...A/ Å | <DHA/° |
|------------------------|--------|----------|----------|--------|
| O(1W)-H(1WA)...O(4)#1  | 0.82   | 2.05     | 2.864(3) | 174.8  |
| O(2W)-H(2WA)...O(1)#2  | 0.82   | 2.08     | 2.868(4) | 162.1  |
| O(3W)-H(3WA)...O(13)#3 | 0.82   | 2.01     | 2.788(3) | 159.0  |
| O(3W)-H(3WB)...O(6)#4  | 0.82   | 1.94     | 2.701(3) | 153.0  |
| O(4W)-H(4WA)...O(12)#5 | 0.82   | 1.87     | 2.663(3) | 162.2  |
| O(5W)-H(5WB)...O(3)#2  | 0.82   | 2.04     | 2.800(3) | 154.2  |
| O(5W)-H(5WA)...O(16)#6 | 0.82   | 1.90     | 2.718(3) | 178.5  |
| O(6W)-H(6WB)...O(2W)#7 | 0.82   | 2.22     | 3.000(3) | 158.9  |
| O(7W)-H(7WA)...O(10)#7 | 0.82   | 2.08     | 2.886(3) | 169.4  |
| O(7W)-H(7WB)...O(4W)#8 | 0.82   | 2.27     | 2.848(3) | 128.2  |
| O(8W)-H(8WA)...O(7)#9  | 0.82   | 2.31     | 2.995(4) | 141.8  |

Symmetry code: #1  $x-1/2, -y+3/2, -z$  #2  $x-1/2, -y+1/2, -z$  #3  $x+1/2, -y+3/2, -z$  #4  $-x+3/2, -y+1, z-1/2$   
#5  $-x+2, y-1/2, -z+1/2$  #6  $x+1/2, -y+1/2, -z$  #7  $-x+3/2, -y+1, z+1/2$  #8  $-x+2, y+1/2, -z+1/2$   
#9  $-x+1, y+1/2, -z+1/2$

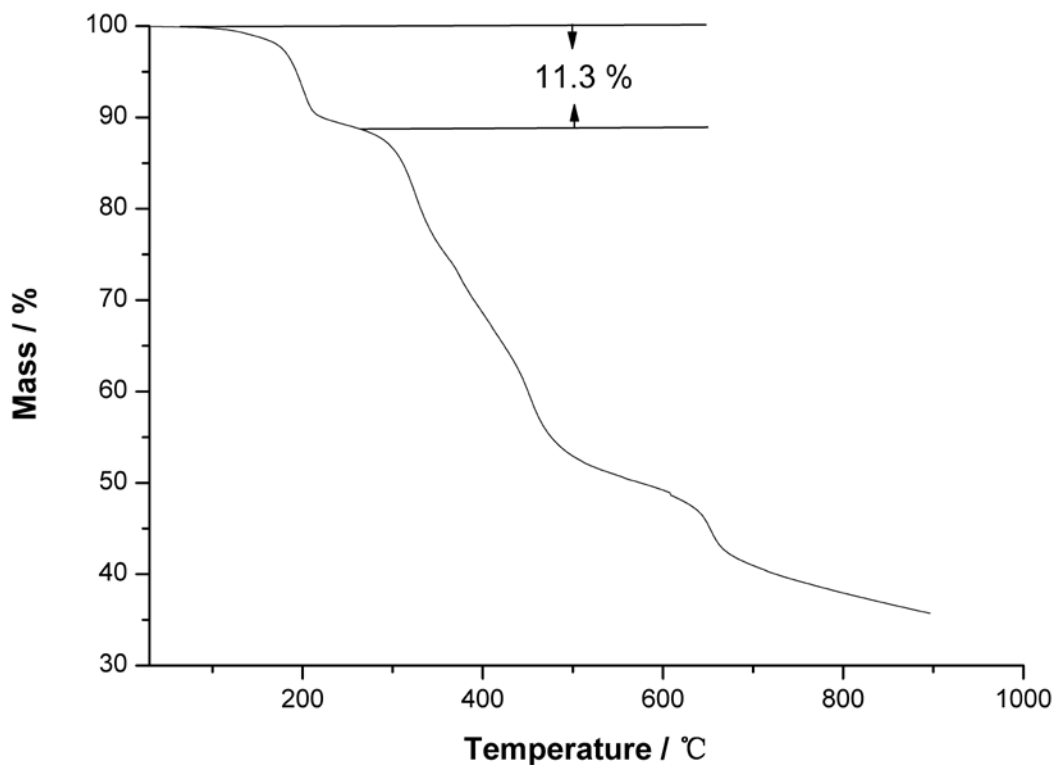

**Fig. S3.** The TGA diagram of **1**. The weight of 11.3 % is corresponding to the loss of guest and coordinated water molecules.
